# Supplementary material
Source: PubMed Central journal article supplement (PMC4689589)
Supplement: NIHMS721901-supplement-Supp_TableS1.pdf [file NIHMS721901-supplement-Supp_TableS1.pdf]

Table 1

## Summary of Studies Examining the Hopelessness Theory of Depression

| Study                                                           | Sample                                                                      | Age | n                              | Follow-up interval | Constructs (Measures)                                                            | Main Findings                                                                                                 |
|-----------------------------------------------------------------|-----------------------------------------------------------------------------|-----|--------------------------------|--------------------|----------------------------------------------------------------------------------|---------------------------------------------------------------------------------------------------------------|
| <i>Negative inferential styles characteristics</i>              |                                                                             |     |                                |                    |                                                                                  |                                                                                                               |
| Haefffel et al. (2005)                                          | Undergraduate students (135 with remitted depression, 718 healthy controls) | A   | 853                            | cross-sectional    | MDE (SADS-L); Inferential styles (CSQ)                                           | Negative inferential styles were higher in those with remitted depression than healthy controls.              |
| Hankin (2008)                                                   | Community                                                                   | T   | 350                            | 5 months           | Inferential styles (ACSQ)                                                        | Negative inferential styles were found to be relatively stable.                                               |
| Hankin, Lakdawalla, Carter, Abela, & Adams (2007)               | Undergraduate students                                                      | A   | study 1 = 950<br>study 2 = 431 | cross-sectional    | Inferential styles (CSQ); Beck's cognitive vulnerability (DAS); Rumination (RSQ) | In factor analysis, negative inferential styles were distinct from dysfunctional attitudes and rumination.    |
| <i>Developmental antecedents to negative inferential styles</i> |                                                                             |     |                                |                    |                                                                                  |                                                                                                               |
| Gibb & Abela (2008)                                             | High Risk (children of adults with depression)                              | C   | 140                            | 12 months          | Emotional Abuse (CTQ-EA); Inferential styles (CASQ & CCSQ)                       | Childhood emotional abuse was associated with negative inferential styles.                                    |
| Gibb, Alloy, Abramson, & Marx (2003)                            | Undergraduate students                                                      | A   | 220                            | cross-sectional    | Childhood maltreatment (LEQ); Inferential styles (CSQ)                           | Childhood emotional abuse, but not physical or sexual abuse, was associated with negative inferential styles. |
| Gibb, Stone, & Crossett (2012)                                  | High Risk (50% children of adults with depression)                          | C   | 100                            | 6 months           | Peer Victimization (SEQ); Inferential styles (CASQ & CCSQ)                       | Relational, but not overt, victimization was associated with negative inferential styles.                     |

|                                           |                                                   |   |                               |                                       |                                                                                                                                                                                                                                                   |                                                                                                                                                                                                                                                     |
|-------------------------------------------|---------------------------------------------------|---|-------------------------------|---------------------------------------|---------------------------------------------------------------------------------------------------------------------------------------------------------------------------------------------------------------------------------------------------|-----------------------------------------------------------------------------------------------------------------------------------------------------------------------------------------------------------------------------------------------------|
| Hankin (2005)                             | Undergraduate students                            | A | study 1 = 652<br>study 2 = 72 | 10 weeks<br>2 years                   | Childhood Maltreatment (LEQ & CECA); Inferential styles (CSQ)                                                                                                                                                                                     | Childhood emotional abuse, but not physical or sexual abuse, was associated with negative inferential styles.                                                                                                                                       |
| Lex & Meyer (2009)                        | Community                                         | T | 196                           | 2 years                               | Hypomania personality (HPS); Perfectionistic Rigidity (Rigidity scale); Inferential styles (CSQ)                                                                                                                                                  | Hypomanic personality and perfectionistic rigidity were not associated with negative inferential styles.                                                                                                                                            |
| Liu, Choi, Boland, Mastin, & Alloy (2013) | Undergraduate students with history of depression | A | 66                            | 4 months                              | Childhood maltreatment (CTQ); Inferential styles (CSQ)                                                                                                                                                                                            | Childhood emotional abuse, but not physical or sexual abuse, was associated with negative inferential styles.                                                                                                                                       |
| Mezulis, Hyde, & Abramson (2006)          | Community                                         | C | 289                           | 2 years                               | Negative life events (APES); Peer sexual harassment (AAUW); Peer victimization (SEQ); Temperament (CBQ); Parental feedback (CRPR); Parental expression (STA EI); Negative parental inferences (behavioral observation); Inferential styles (CCSQ) | Peer victimization was associated with negative inferential styles.<br><br>Maternal anger, negative maternal feedback, and a withdrawal negativity temperamental style interacted with negative life events to predict negative inferential styles. |
| Padilla Paredes & Calvete (2014)          | Community                                         | T | 1316                          | longitudinal (duration not specified) | CEA (CTS-PC); Peer emotional abuse (PRQ); Inferential styles (CSQ)                                                                                                                                                                                | Childhood emotional abuse and peer victimization were associated with negative inferential styles.                                                                                                                                                  |
| Pearson et al. (2013)                     | Mothers and offspring                             | A | 2528                          | 18 years                              | Beck's cognitive vulnerability (DAS);                                                                                                                                                                                                             | Negative inferential styles in offspring mediated relation                                                                                                                                                                                          |

|                                                   |                                                                              |    |      |                     |                                                                                                                  |                                                                                         |
|---------------------------------------------------|------------------------------------------------------------------------------|----|------|---------------------|------------------------------------------------------------------------------------------------------------------|-----------------------------------------------------------------------------------------|
|                                                   |                                                                              |    |      |                     | Inferential styles (CSQ-SF); Major depression (clinical interview)                                               | between maternal self-schemata during pregnancy and depression in offspring.            |
| <i>Negative inferential styles and depression</i> |                                                                              |    |      |                     |                                                                                                                  |                                                                                         |
| Abela, Stolow, Zhang, & McWhinnie (2012)          | Undergraduate students                                                       | A  | 60   | cross-sectional     | Inferential Styles (LSI & CSQ); Beck's cognitive vulnerability (LSI); MDE (SCID)                                 | Negative inferential styles were associated with major depression.                      |
| Alloy et al. (2012)                               | Community                                                                    | T  | 413  | cross-sectional     | Inferential styles (ACSQ); MDE (K-SADS)                                                                          | Negative inferential styles were associated with past but not current major depression. |
| Barnum, Woody, & Gibb (2013)                      | Community (pregnant women in 3 <sup>rd</sup> trimester)                      | A  | 101  | 8 weeks post-partum | Inferential styles (EASQ modified to include inferences about self and consequences); Depressive symptoms (EPDS) | Negative inferential styles were associated with depressive symptom severity.           |
| Calvete, Orue, & Hankin (2013)                    | Community                                                                    | T  | 1187 | 6 months            | Inferential styles (ACSQ); Depressive symptoms (CES-D)                                                           | Negative inferential styles were associated with depressive symptom severity.           |
| Dunbar et al. (2013)                              | High-risk (children of adults with history of depression)                    | CT | 165  | cross-sectional     | Inferential styles (ACSQ); Depressive symptoms (K-SADS, CBCL, YSR)                                               | Negative inferential styles were associated with depressive symptom severity.           |
| Fletcher, Parker, & Manicavasagar (2013)          | Clinical (109 depressed, 100 healthy controls, 94 bipolar I, 114 bipolar II) | A  | 381  | cross-sectional     | Inferential styles (ISQ); Depressive symptoms (QIDS-SR)                                                          | Negative inferential styles were associated with depressive symptom severity.           |

|                            |                                                                             |   |                                |                                  |                                                                                                |                                                                                                                                           |
|----------------------------|-----------------------------------------------------------------------------|---|--------------------------------|----------------------------------|------------------------------------------------------------------------------------------------|-------------------------------------------------------------------------------------------------------------------------------------------|
| Haefel (2011)              | Undergraduate students                                                      | A | 87                             | 1 week                           | Inferential styles (CSQ); Event-specific inferences (PIQ); Depressive symptoms (MASQ)          | Negative inferential styles were associated with depressive symptom severity.                                                             |
| Haefel et al. (2005)       | Undergraduate students (135 with remitted depression, 718 healthy controls) | A | 853                            | cross-sectional                  | Inferential styles (CSQ); MDE (SADS-L)                                                         | Negative inferential styles were associated with remitted major depression.                                                               |
| Hamilton et al. (2013)     | Community                                                                   | T | 301                            | 9 months                         | Inferential styles (ACSQ); Depressive symptoms (CDI)                                           | Negative inferential styles were associated with depressive symptom severity.                                                             |
| Hong (2013)                | Undergraduate students                                                      | A | study 1 = 140<br>study 2 = 210 | 4 weeks                          | Inferential styles (CSQ); Depressive symptoms (BDI-II & IDAS)                                  | Negative inferential styles were associated with depressive symptom severity.                                                             |
| Hong, Gwee, & Karia (2006) | Undergraduate students                                                      | A | 242                            | 6 weeks                          | Inferential styles (CSQ); Specific inferences (SIQ); Hopelessness (BHS); HD symptoms (CESD-HD) | Negative inferential styles were associated with hopelessness depression symptom severity through the mediational effect of hopelessness. |
| Mezulis & Rudolph (2012)   | Community                                                                   | T | 113                            | 8 weeks                          | Inferential styles (EA-ACSQ); Depressive symptoms (CDI-S)                                      | Negative inferential styles were associated with depressive symptom severity.                                                             |
| Nusslock et al. (2011)     | Undergraduate students with no history of                                   | A | 40                             | at least 1 year (mean = 3 years) | Inferential styles (CSQ); MDE (SADS-C)                                                         | Negative inferential styles were associated with onset of major and minor depression.                                                     |

|                                                                |                                                                                              |   |                                      |                 |                                                                                                                               |                                                                                                                                        |
|----------------------------------------------------------------|----------------------------------------------------------------------------------------------|---|--------------------------------------|-----------------|-------------------------------------------------------------------------------------------------------------------------------|----------------------------------------------------------------------------------------------------------------------------------------|
| O'Connor, Connery, & Cheyne (2000)                             | depression<br>Patients with self-harm and controls admitted to the same emergency department | A | 40                                   | cross-sectional | Inferential styles (CSQ); Hopelessness (BHS); Depressive symptoms (HADS)                                                      | Negative inferential styles were associated with hopelessness and depressive symptom severity.                                         |
| Rose, Abramson, Hodulik, Halberstadt, & Leff (1994)            | 134 clinical inpatients and 54 health controls                                               | A | 188 (106 for diagnostic comparisons) | cross-sectional | MDE (SADS-L); Lifetime % depressed (LDI); Inferential styles (ISQ)                                                            | Negative inferential styles were associated with major depression.                                                                     |
| Sutton et al. (2011)                                           | Community                                                                                    | T | 550                                  | cross-sectional | Inferential styles (CSQ); Neuroticism (IPIP-NEO-PI-R); Beck's cognitive vulnerability (DAS); Depressive symptoms (IDD & MASQ) | Negative inferential styles were associated with depressive symptom severity, but overlapped with other depressogenic vulnerabilities. |
| Young, LaMontagne, Dietrich, & Wells (2012)                    | Community                                                                                    | T | 111                                  | cross-sectional | Inferential styles (CCSQ); Rumination (RRS); Beck's cognitive vulnerability (DAS); Depressive symptoms (CES-DC)               | Negative inferential styles were associated with depressive symptom severity, but not after accounting for rumination.                 |
| Zhou, Chen, Liu, Lu, & Su (2013)                               | Undergraduate students                                                                       | A | 426                                  | cross-sectional | Inferential styles (CSQ-SF); Hopelessness depression symptoms (HDSQ)                                                          | Negative inferential styles were associated with hopelessness depression symptom severity.                                             |
| <i>Life events and the hopelessness theory</i><br>Abela (2001) | Community                                                                                    | C | 382                                  | 6 weeks         | Inferential styles                                                                                                            | Negative inferential styles                                                                                                            |

|                                           |                                                           |   |     |           |                                                                                                    |                                                                                                                                             |
|-------------------------------------------|-----------------------------------------------------------|---|-----|-----------|----------------------------------------------------------------------------------------------------|---------------------------------------------------------------------------------------------------------------------------------------------|
|                                           |                                                           |   |     |           | (CASQ & CCSQ);<br>Negative life events (CLES);<br>Depressive symptoms (CDI);<br>Hopelessness (HSC) | interacted with life stressors to predict depressive symptom severity in girls but not boys. Hopelessness did not mediate this association. |
| Abela, Aydin, & Auerbach (2006)           | Adults with current or history of depression              | A | 102 | 54 weeks  | Inferential styles (EASQ & CSQ);<br>Hassles (HS);<br>Depression symptoms (BDI)                     | Depressogenic weakest link interacted with daily hassles to predict depressive symptom severity.                                            |
| Abela, Brozina, & Seligman (2004)         | Undergraduate students                                    | A | 165 | 5 weeks   | Inferential styles (CSQ & EASQ);<br>Negative life events (NLEQ);<br>Depressive symptoms (BDI)      | Primed negative inferential styles interacted with life stressors to predict depressive symptom severity.                                   |
| Abela & McGirr (2007)                     | High-risk (children of adults with history of depression) | C | 140 | 12 months | Inferential styles (CASQ & CCSQ);<br>Daily hassles (CHAS);<br>Depressive symptoms (CDI)            | Depressogenic weakest link interacted with daily hassles to predict depressive symptom severity in girls but not boys.                      |
| Abela, McGirr, & Skitch (2007)            | Community                                                 | C | 382 | 6 weeks   | Inferential styles (CASQ & CCSQ);<br>Negative life events (CLES);<br>Depressive symptoms (CDI)     | Depressogenic weakest link interacted with life stressors to predict depressive symptom severity.                                           |
| Abela, Parkinson, Stolow, & Starrs (2009) | Community                                                 | T | 367 | 6 weeks   | Inferential styles (CASQ & CCSQ);<br>Negative life events (CLES);<br>Depressive symptoms (CDI)     | Depressogenic weakest link interacted with life stressors to predict symptoms of hopelessness depression not general depression.            |

|                         |                        |   |               |          |                                                                                                              |                                                                                                                                                  |
|-------------------------|------------------------|---|---------------|----------|--------------------------------------------------------------------------------------------------------------|--------------------------------------------------------------------------------------------------------------------------------------------------|
| Abela & Payne (2003)    | Community              | C | 314           | 6 weeks  | Inferential styles (CASQ & CCSQ); Hassles (CHAS); Depressive symptoms (CDI)                                  | Negative inferential styles interacted with hassles to predict symptoms of hopelessness depression not non-hopelessness depression.              |
| Abela & Sarin (2002)    | Community              | C | 79            | 10 weeks | Inferential styles (CASQ & CCSQ); Negative life events (CLES); Depressive symptoms (CDI)                     | Depressogenic weakest link interacted with hassles to predict symptoms of hopelessness depression not non-hopelessness depression.               |
| Abela & Seligman (2000) | Community              | T | study 1 = 149 | 3 days   | Inferential styles (EASQ & CSQ); Depressive symptoms (MAACL)                                                 | Negative inferential styles interacting with life stressors were associated with depressive symptom severity currently but not three days later. |
|                         | Undergraduate students | A | study 2 = 77  | 3 days   | Inferential styles (EASQ & CSQ); Depressive symptoms (MAACL)                                                 |                                                                                                                                                  |
| Abela et al. (2011)     | Community              | T | 1150          | 6 months | Inferential styles (ACSQ); Negative life events (ALEQ); Depressive symptoms (CES-D); Anxiety symptoms (MASC) | Negative inferential styles interacted with life stressors to predict depressive, but not anxious, symptom severity.                             |
| Auerbach & Ho (2012)    | Community              | T | 179           | 18 weeks | Inferential styles (ACSQ); Negative life events (ALEQ); Depressive symptoms (CES-D)                          | Negative inferential styles interacted with interpersonal peer stressors to predict depressive symptom severity.                                 |
| Brozina & Abela         | Community              | C | 418           | 6 weeks  | Inferential styles                                                                                           | Negative inferential styles                                                                                                                      |

(2006)

|                                           |                        |   |     |          |                                                                                                                                                                     |                                                                                                                                                                                                                                    |
|-------------------------------------------|------------------------|---|-----|----------|---------------------------------------------------------------------------------------------------------------------------------------------------------------------|------------------------------------------------------------------------------------------------------------------------------------------------------------------------------------------------------------------------------------|
| Calvete, Villardón, & Estévez (2008)      | Community              | T | 856 | 6 months | (CASQ & CCSQ); Hassles (CHAS); Depressive symptoms (CDI); Anxiety symptoms (MASC) Inferential styles (ACSQ); Negative life events (APES); Depressive symptoms (YSR) | interacted with hassles to predict depressive symptom severity. Negative inferential styles predicted anxiety symptom severity. Negative inferential styles interacted with life stressors to predict depressive symptom severity. |
| Cohen, Young, & Abela (2012)              | Community              | C | 206 | 7 weeks  | Inferential styles (CASQ & CCSQ); Negative life events (CLES); Depressive symptoms (CDI)                                                                            | Negative inferential styles interacted with life stressors to predict depressive symptom severity.                                                                                                                                 |
| Gibb, Beevers, Andover, & Holleran (2006) | Undergraduate students | A | 162 | 6 weeks  | Inferential styles (CSQ); Negative life events (HUS); Depressive symptoms (BDI-II)                                                                                  | Negative inferential styles interacted with life stressors to predict depressive symptom severity.                                                                                                                                 |
| Haeffel, Abramson, Brazy, & Shah (2008)   | Undergraduate students | A | 248 | 5 weeks  | Inferential styles (CSQ); Negative life events (ALEQ); Depressive symptoms (BDI)                                                                                    | Negative inferential styles interacted with life stressors to predict depressive symptom severity.                                                                                                                                 |
| Haeffel & Vargas (2011)                   | Undergraduate students | A | 128 | 4 weeks  | Inferential styles (CSQ); Life events (ALEQ); Depressive symptoms (BDI)                                                                                             | Negative inferential styles interacted with life stressors to predict depressive symptom severity.                                                                                                                                 |
| Hankin (2008b)                            | Community              | T | 350 | 5 months | Inferential styles (ACSQ); Negative life                                                                                                                            | Negative inferential styles interacted with life stressors to                                                                                                                                                                      |



|                                            |                        |   |                                                |          |                                                                                                                                      |                                                                                                                                                                                                                                                                            |
|--------------------------------------------|------------------------|---|------------------------------------------------|----------|--------------------------------------------------------------------------------------------------------------------------------------|----------------------------------------------------------------------------------------------------------------------------------------------------------------------------------------------------------------------------------------------------------------------------|
|                                            |                        |   |                                                |          | events (ALEQ);<br>Depressive symptoms (CDI); General internalizing and externalizing symptoms (SDQ); Anxiety symptoms (MASQ)         | predict depressive symptom severity, but not anxious symptoms or general internalizing or externalizing symptoms.                                                                                                                                                          |
| Hankin (2010)                              | Undergraduate students | A | 210                                            | 35 days  | Inferential styles (CSQ); Daily stressors (Daily Diary Form); Depressive symptoms (BDI)                                              | Negative inferential styles interacted with daily stressors to predict depressive symptom severity.                                                                                                                                                                        |
| Hankin, Abramson, Miller, & Haeffel (2004) | Undergraduate students | A | 233<br>(75 for analyses relating to diagnoses) | 2 years  | Inferential styles (CSQ); Beck's cognitive vulnerability (DAS); Negative life events (NLEQ); MDE (SADS-L); Anxiety symptoms (SADS-L) | The interaction between negative inferential styles and life stressors was associated with depressive episodes, but not anxiety disorders. This interaction became non-significant after accounting for the interaction between negative self-schemata and life stressors. |
| Kercher & Rapee (2009)                     | Community              | T | 756                                            | 6 months | Inferential styles (ACSQ); Negative life events (ALEQ); Depressive symptoms (CES-D)                                                  | Negative inferential styles interacted with life stressors to predict depressive symptom severity.                                                                                                                                                                         |
| Lakdawalla & Hankin (2008)                 | Undergraduate students | A | 233                                            | 2 years  | Inferential styles (CSQ); Negative life events (NLEQ); Depressive symptoms (BDI)                                                     | Negative inferential styles interacted with life stressors to predict depressive symptom severity.                                                                                                                                                                         |

|                                               |                        |    |     |                 |                                                                                                                               |                                                                                                                                                                    |
|-----------------------------------------------|------------------------|----|-----|-----------------|-------------------------------------------------------------------------------------------------------------------------------|--------------------------------------------------------------------------------------------------------------------------------------------------------------------|
| Lee, Hankin, & Mermelstein (2010)             | Community              | T  | 350 | 10 weeks        | Inferential styles (ACSQ); Family and peer relationships (NRI); Depressive symptoms (CDI)                                     | Negative inferential styles interacted with parental interactions to predict depressive symptom severity.                                                          |
| Metalsky & Joiner (1992)                      | Undergraduate students | A  | 152 | 5 weeks         | Inferential styles (CSQ); Negative life events (NLEQ); Depressive symptoms (BDI); Anxiety symptoms (STAI); Hopelessness (EHS) | Negative inferential styles interacted with life stressors to predict depressive, but not anxious, symptom severity through the partial mediation of hopelessness. |
| Mezulis, Funasaki, Charbonneau, & Hyde (2010) | Community              | T  | 366 | 4 years         | Inferential styles (CCSQ); Negative life events (APES); Depressive symptoms (CDI)                                             | Negative inferential styles interacted with life stressors to predict depressive symptom severity in girls but not boys.                                           |
| Rood, Roelofs, Bögels, & Meesters (2012)      | Community              | CT | 805 | cross-sectional | Inferential styles (ACSQ); Negative life events (CLES); Depressive symptoms (CDI)                                             | The interaction between negative inferential styles and life stressors was associated with depressive symptom severity in boys but not girls.                      |
| Stange, Alloy, Flynn, & Abramson (2013)       | Community              | T  | 256 | 9 months        | Inferential styles (ACSQ); Negative life events (ALEQ & LEI); Depressive symptoms (CDI)                                       | A main effect was found for negative inferential styles predicting depressive symptom severity. No interaction with life stressors was observed.                   |
| Stone, Gibb, & Coles (2010)                   | Undergraduate students | A  | 458 | 6 months        | Inferential styles (CSQ); Negative life events (LES); Depressive symptoms (BDI-II)                                            | Negative inferential styles interacted with life stressors to predict depressive symptom severity in men but not women.                                            |

***Hopelessness Depression***

|                                           |                                                               |                  |                                                                    |                 |                                                               |                                                                                                                                                                                                                 |
|-------------------------------------------|---------------------------------------------------------------|------------------|--------------------------------------------------------------------|-----------------|---------------------------------------------------------------|-----------------------------------------------------------------------------------------------------------------------------------------------------------------------------------------------------------------|
| Abela, Gagnon, & Auerbach (2007)          | Children with clinically significant depressive symptoms      | C                | 39                                                                 | cross-sectional | Hopelessness (HSC); Depressive symptoms (K-SADS, CDI & CBCL)  | Hopelessness depression displayed good internal consistency. Hopelessness was more strongly related to hopelessness depression symptoms than to non-hopelessness depression symptoms.                           |
| Haslam & Beck (1994)                      | Outpatients with depression                                   | A                | 531                                                                | cross-sectional | Depressive symptoms (BDI)                                     | Hopelessness depression displayed poor internal consistency.                                                                                                                                                    |
| Joiner et al. (2001)                      | Outpatients<br>Outpatients<br>Outpatients<br>Air Force Cadets | A<br>A<br>A<br>A | study 1 = 1604<br>study 2 = 844<br>study 3 = 680<br>study 4 = 1404 | cross-sectional | Depressive symptoms (BDI)                                     | Support was found for a distinct cluster of hopelessness depression symptoms, for which a small but significant difference from other depressive symptoms was observed                                          |
| Whisman, Miller, Norman, & Keitner (1995) | Inpatients with depression                                    | A                | 80                                                                 | cross-sectional | Hopelessness (BHS); Depressive symptoms (BDI & modified HRSD) | Partial support was found for a relation between hopelessness and hopelessness depression symptoms. Hopelessness depression displayed poor internal consistency.                                                |
| Whisman & Pinto (1997)                    | Inpatients with depression                                    | T                | 160                                                                | cross-sectional | Hopelessness (HSC); Depressive symptoms (BDI)                 | Hopelessness depression was found to have a continuous rather than categorical latent structure. Hopelessness was more strongly related to hopelessness depression symptoms than to non-hopelessness depression |

symptoms.

***Negative inferential styles and self-injurious thoughts and behavior***

|                                |                                                                                |   |     |                 |                                                                                                              |                                                                                                                                                 |
|--------------------------------|--------------------------------------------------------------------------------|---|-----|-----------------|--------------------------------------------------------------------------------------------------------------|-------------------------------------------------------------------------------------------------------------------------------------------------|
| Hankin & Abela (2011)          | Community                                                                      | T | 103 | 2.5 years       | Inferential styles (ACSQ); Non-suicidal self-injury (FASM)                                                   | Negative inferential styles predicted non-suicidal self-injury.                                                                                 |
| Kleiman, Law, & Anestis (2014) | Undergraduate students with elevated depressive symptoms                       | A | 245 | 6-8 weeks       | Inferential styles (CSQ); Thwarted belongingness and perceived burdensomeness (INQ); Suicidal ideation (BSS) | Negative inferential styles were associated with suicidal ideation. Thwarted belongingness and perceived burdensomeness mediated this relation. |
| O'Connor et al. (2000)         | Patients with self-harm and controls admitted to the same emergency department | A | 40  | cross-sectional | Inferential styles (CSQ); Hopelessness (BHS); Depressive symptoms (HADS )                                    | Negative inferential styles were marginally associated with self-harm.                                                                          |

***Positive inferential styles, adaptive inferential feedback, and recovery from depression***

|                                                         |                                                  |   |     |                 |                                                                                            |                                                                                                                     |
|---------------------------------------------------------|--------------------------------------------------|---|-----|-----------------|--------------------------------------------------------------------------------------------|---------------------------------------------------------------------------------------------------------------------|
| Dobkin et al. (2007)                                    | Community and physician referral with depression | A | 10  | 18-22 weeks     | Inferential styles (IQ); MDE (SCID); Depressive symptoms (BDI & HRSD)                      | Adaptive inferential feedback was associated with less negative inferential styles and depressive symptom severity. |
| Dobkin, Panzarella, Fernandez, Alloy, & Cascardi (2004) | Undergraduate students                           | A | 150 | cross-sectional | Inferential styles (CSQ); Depressive symptoms (MAACL)                                      | Adaptive inferential feedback was associated with less negative inferential styles and depressive symptom severity. |
| Lex & Meyer (2009)                                      | Community                                        | T | 196 | 2 years         | Hypomania personality (HPS); Perfectionistic Rigidity (Rigidity scale); Inferential styles | Positive inferential styles were positively associated with hypomanic personality and perfectionistic rigidity.     |

|                                    |                                                                                |   |                                      |                 |                                                                                                    |                                                                                                                                                                                        |
|------------------------------------|--------------------------------------------------------------------------------|---|--------------------------------------|-----------------|----------------------------------------------------------------------------------------------------|----------------------------------------------------------------------------------------------------------------------------------------------------------------------------------------|
| O'Connor et al. (2000)             | Patients with self-harm and controls admitted to the same emergency department | A | 40                                   | cross-sectional | (CSQ)<br>Inferential styles (CSQ); Hopelessness (BHS); Depressive symptoms (HADS)                  | No association was found positive inferential styles and self-harm.                                                                                                                    |
| Peters, Constans, & Mathews (2011) | Undergraduate students                                                         | A | 54                                   | cross-sectional | Inferential styles (Custom event-specific questions); Depressive symptoms (Profile of Mood States) | Cognitive bias modification training for positive attributions was associated with reduced likelihood of making negative self-inferences and reduction in depressive symptom severity. |
| Rose et al. (1994)                 | 134 clinical inpatients and 54 health controls                                 | A | 188 (106 for diagnostic comparisons) | cross-sectional | MDE (SADS-L); Lifetime % depressed (LDI); Inferential styles (ISQ)                                 | Positive inferential styles were negatively associated with major depression.                                                                                                          |

Note: C = child, T = teenager, A = adult; AAUW = American Association of University Women Survey of Sexual Harassment; ACSQ = Adolescent Cognitive Style Questionnaire; ALEQ = Adolescent Life Events Questionnaire; APES = Adolescent Perceived Events Scale; BDI = Beck Depression Inventory; BDI-II = Beck Depression Inventory-II; BHS = Beck Hopelessness Scale; BSS = Beck Scale for Suicidal Ideation; CASQ = Children's Attributional Style Questionnaire; CBCL = Child Behavior Checklist; CBQ = Child Behavior Questionnaire; CCSQ = Children's Cognitive Style Questionnaire; CDI = Children's Depression Inventory; CDI-S = Children's Depression Inventory – Short Version; CECA = Childhood Experience of Care and Abuse Interview; CES-D = Center for Epidemiologic Studies Depression Scale; CES-DC = Center for Epidemiologic Studies Depression Scale for Children; CESD-HD = Center for Epidemiologic Studies Depression Scale – Hopelessness Depression; CHAS = Children Hassles Scale; CLES = Children's

Life Events Scale; CRPR = Child-Rearing Practices Report; CSQ = Cognitive Style Questionnaire; CSQ-SF = Cognitive Style Questionnaire – Short Form; CTS-PC = Conflict Tactics Scales Parent-to-Child; CTQ = Childhood Trauma Questionnaire; CTQ-EA = Childhood Trauma Questionnaire – Emotional Abuse Subscale; DAS = Dysfunctional Attitude Scale; EA-ACSQ = Event Anchored Adolescent Cognitive Style Questionnaire; EASQ = Expanded Attributional Style Questionnaire; EHS = Extended Hopelessness Scale; EPDS = Edinburgh Postnatal Depression Scale; FASM = Functional Assessment of Self-Mutilation; HADS = Hospital Anxiety and Depression Scale; HDSQ = Hopelessness Depression Symptom Questionnaire; HPS = Hypomanic Personality Scale; HRSD = Hamilton Rating Scale for Depression; HS = Hassles Scale; HSC = Hopelessness Scale for Children; HUS = Hassles and Uplift Scale; IDAS = Inventory of Depression and Anxiety Symptoms; IDD = Inventory to Diagnose Depression; INQ = Interpersonal Needs Questionnaire; IPIP-NEO-PI-R = International Personality Item Pool-NEO-PI-R; ISQ = Inferential Styles Questionnaire; K-SADS = Schedule for Affective Disorders and Schizophrenia for School-Age Children; LEI = Life Events Interview; LDI = Lifetime Depression Index; LEQ = Life Experiences Questionnaire; LES = Life Events Scale; LSI = Life Story Interview; MAACL = Multiple Affect Adjective Check List; MASC = Multidimensional Anxiety Scale for Children; MASQ = Mood and Anxiety Symptom Questionnaire; NLEQ = Negative Life Events Questionnaire; NRI = Network of Relationships Inventory; PIQ = Particular Inference Questionnaire; PRQ = Peer Relations Questionnaire; QIDS-SR = Quick Inventory of Depressive Symptomatology-Self-Report; RRS = Ruminative Response Scale; RSQ = Response Styles Questionnaire; SADS-C = Schedule for Affective Disorders and Schizophrenia–Change; SADS-L = Schedule for Affective Disorders and Schizophrenia Lifetime; SCID = Structured Clinical

Interview for DSM; SEQ = Social Experiences Questionnaire; SIQ = Specific Inferences Questionnaire; STAEI = State-Trait Anger Expression Inventory; STAI = State-Trait Anxiety Inventory; YSR = Youth Self-Report
